# Supplementary material for: Statistical approaches to identify subgroups in meta-analysis of individual participant data: a simulation study
Source: BMC Med Res Methodol. 2019 Sep 2;19:183. doi: 10.1186/s12874-019-0817-6 (PMC6720416; doi:10.1186/s12874-019-0817-6)
Supplement: Supplementary file 4 — Large subgroup effect Continuous outcome (power and bias) (XLSX 14 kb) [file 12874_2019_817_MOESM4_ESM.xlsx]

## Sheet: Sheet1
Number of trials	Number of patients	Heterogeneity magnitude	Ecological Bias	Centered one-stage IPD-MA power	Naive one-stage IPD-MA power	MA of interaction terms power	Per-Subgroup MA power	Meta Regression power	Centered one-stage IPD-MA BIAS [IQR]	Naive one-stage IPD-MA BIAS [IQR]	MA of interaction terms BIAS [IQR]	Per-Subgroup MA BIAS [IQR]	Meta Regression BIAS [IQR]
5	50	No Heterogeneity	No ecological bias	47.8 %	47.9 %	47 %	50.8 %	8.5 %	0.003 [0.328]	0.005 [0.32]	0.001 [0.351]	0.002 [0.346]	0.038 [1.339]
5	50	No Heterogeneity	Favouring treatment ecological bias	47 %	44.3 %	45.4 %	46 %	4.5 %	0.017 [0.342]	0.041 [0.339]	0.016 [0.369]	0.04 [0.359]	0.49 [1.341]
5	50	No Heterogeneity	Favouring placebo ecological bias	48.4 %	41.9 %	47.9 %	31.3 %	12.5 %	0.001 [0.367]	0.057 [0.368]	-0.002 [0.376]	0.078 [0.372]	1.528 [1.317]
5	50	Medium Heterogeneity	No ecological bias	50.1 %	49.5 %	48.7 %	40.8 %	6.4 %	-0.003 [0.352]	-0.002 [0.342]	-0.003 [0.383]	-0.003 [0.37]	0.033 [1.701]
5	50	Medium Heterogeneity	Favouring treatment ecological bias	46.3 %	46.1 %	45.2 %	34.7 %	5.7 %	0.014 [0.345]	0.028 [0.344]	0.014 [0.363]	0.038 [0.373]	0.512 [1.565]
5	50	Medium Heterogeneity	Favouring placebo ecological bias	47.1 %	42.4 %	44.6 %	26.6 %	8.6 %	0.012 [0.366]	0.047 [0.36]	0.014 [0.387]	0.077 [0.367]	1.487 [1.672]
5	50	Large Heterogeneity	No ecological bias	48.7 %	49.4 %	47.7 %	23.4 %	5.2 %	-0.003 [0.369]	-0.001 [0.37]	-0.004 [0.378]	-0.002 [0.383]	0.03 [2.43]
5	50	Large Heterogeneity	Favouring treatment ecological bias	47.2 %	47 %	45.7 %	19.5 %	6.3 %	0.003 [0.358]	0.009 [0.356]	0.007 [0.372]	0.017 [0.369]	0.497 [2.53]
5	50	Large Heterogeneity	Favouring placebo ecological bias	47.4 %	45.8 %	46.3 %	14.4 %	6.1 %	0.013 [0.356]	0.03 [0.358]	0.014 [0.382]	0.061 [0.389]	1.517 [2.577]
5	100	No Heterogeneity	No ecological bias	78.5 %	80.3 %	75.1 %	78.3 %	8.9 %	-0.006 [0.257]	-0.005 [0.258]	-0.006 [0.277]	-0.005 [0.263]	-0.009 [0.958]
5	100	No Heterogeneity	Favouring treatment ecological bias	76.2 %	72.9 %	74.5 %	68.8 %	4.3 %	0.005 [0.259]	0.031 [0.255]	0.005 [0.273]	0.034 [0.264]	0.516 [0.912]
5	100	No Heterogeneity	Favouring placebo ecological bias	77.8 %	71.9 %	77.5 %	46 %	18.8 %	0.001 [0.245]	0.042 [0.241]	0 [0.25]	0.071 [0.24]	1.515 [0.921]
5	100	Medium Heterogeneity	No ecological bias	77.3 %	78.2 %	76.8 %	60.5 %	6.7 %	-0.001 [0.251]	-0.001 [0.247]	-0.003 [0.26]	-0.003 [0.247]	0 [1.411]
5	100	Medium Heterogeneity	Favouring treatment ecological bias	79.7 %	79.4 %	78.1 %	53.8 %	4.8 %	-0.01 [0.242]	0 [0.249]	-0.01 [0.259]	0.007 [0.247]	0.449 [1.339]
5	100	Medium Heterogeneity	Favouring placebo ecological bias	76.8 %	74 %	75.2 %	34.2 %	11.1 %	0.003 [0.246]	0.024 [0.255]	0.002 [0.25]	0.055 [0.247]	1.525 [1.373]
5	100	Large Heterogeneity	No ecological bias	79.3 %	78.9 %	76.3 %	29 %	6.9 %	-0.002 [0.251]	-0.003 [0.255]	-0.001 [0.258]	-0.003 [0.268]	-0.063 [2.44]
5	100	Large Heterogeneity	Favouring treatment ecological bias	77.4 %	76.9 %	76.4 %	23.5 %	4.2 %	0.001 [0.241]	0.005 [0.241]	-0.001 [0.255]	0.011 [0.261]	0.536 [2.179]
5	100	Large Heterogeneity	Favouring placebo ecological bias	77.1 %	77 %	76.2 %	19.8 %	8.4 %	0.004 [0.248]	0.012 [0.242]	0.004 [0.25]	0.029 [0.265]	1.426 [2.454]
5	200	No Heterogeneity	No ecological bias	96.7 %	97.2 %	95.9 %	94.5 %	11.4 %	0.005 [0.178]	0.005 [0.178]	0.004 [0.182]	0.006 [0.181]	0.016 [0.629]
5	200	No Heterogeneity	Favouring treatment ecological bias	97.4 %	96.1 %	96.4 %	93.8 %	6.1 %	-0.002 [0.174]	0.022 [0.173]	-0.002 [0.181]	0.026 [0.181]	0.505 [0.633]
5	200	No Heterogeneity	Favouring placebo ecological bias	97.4 %	95.7 %	96.9 %	72.5 %	30.3 %	-0.003 [0.167]	0.023 [0.173]	-0.002 [0.172]	0.055 [0.169]	1.468 [0.612]
5	200	Medium Heterogeneity	No ecological bias	97.2 %	97.7 %	96.2 %	71 %	7.9 %	0.008 [0.171]	0.008 [0.176]	0.009 [0.174]	0.008 [0.176]	-0.001 [1.383]
5	200	Medium Heterogeneity	Favouring treatment ecological bias	97.2 %	96.6 %	96.3 %	70.2 %	5.1 %	-0.002 [0.182]	0.003 [0.176]	-0.002 [0.186]	0.013 [0.182]	0.485 [1.271]
5	200	Medium Heterogeneity	Favouring placebo ecological bias	98.5 %	97.6 %	97.9 %	48.2 %	14 %	-0.002 [0.165]	0.009 [0.171]	-0.003 [0.172]	0.032 [0.178]	1.492 [1.27]
5	200	Large Heterogeneity	No ecological bias	96.7 %	97.1 %	96.5 %	30.8 %	5.9 %	-0.001 [0.165]	-0.001 [0.17]	-0.001 [0.171]	0 [0.178]	0.019 [2.236]
5	200	Large Heterogeneity	Favouring treatment ecological bias	97.1 %	97.2 %	96.6 %	29.1 %	4.6 %	0.001 [0.171]	0.003 [0.174]	0.001 [0.175]	0.008 [0.18]	0.558 [2.157]
5	200	Large Heterogeneity	Favouring placebo ecological bias	97.7 %	97.3 %	96.3 %	24 %	7.4 %	0.001 [0.191]	0.004 [0.191]	0.001 [0.19]	0.017 [0.191]	1.486 [2.24]
10	50	No Heterogeneity	No ecological bias	75.5 %	77.9 %	72.9 %	75.2 %	11.6 %	0.014 [0.244]	0.011 [0.239]	0.015 [0.261]	0.012 [0.253]	-0.039 [0.94]
10	50	No Heterogeneity	Favouring treatment ecological bias	77.3 %	73.7 %	74.9 %	71 %	4.4 %	0.008 [0.247]	0.037 [0.237]	0.008 [0.267]	0.036 [0.258]	0.489 [0.942]
10	50	No Heterogeneity	Favouring placebo ecological bias	78.9 %	68.8 %	76.5 %	53.5 %	28.4 %	0.001 [0.249]	0.06 [0.259]	-0.004 [0.272]	0.081 [0.258]	1.517 [0.922]
10	50	Medium Heterogeneity	No ecological bias	78.8 %	78.8 %	76.7 %	66.4 %	8.7 %	-0.006 [0.247]	-0.005 [0.255]	-0.007 [0.255]	-0.005 [0.262]	-0.011 [1.224]
10	50	Medium Heterogeneity	Favouring treatment ecological bias	77.2 %	75.2 %	75.9 %	58.8 %	5 %	-0.007 [0.265]	0.01 [0.264]	-0.009 [0.273]	0.02 [0.274]	0.523 [1.151]
10	50	Medium Heterogeneity	Favouring placebo ecological bias	77.9 %	72.2 %	75.7 %	45.2 %	18.4 %	-0.002 [0.246]	0.034 [0.249]	-0.003 [0.263]	0.066 [0.261]	1.488 [1.246]
10	50	Large Heterogeneity	No ecological bias	75.8 %	76.5 %	74.9 %	39 %	6 %	-0.002 [0.262]	-0.001 [0.264]	0 [0.271]	0 [0.265]	0.014 [1.809]
10	50	Large Heterogeneity	Favouring treatment ecological bias	77.6 %	77.3 %	76.9 %	35.7 %	5.7 %	0.004 [0.237]	0.01 [0.238]	0.002 [0.246]	0.019 [0.247]	0.519 [1.761]
10	50	Large Heterogeneity	Favouring placebo ecological bias	77.8 %	74.9 %	78.4 %	26.3 %	10.1 %	-0.003 [0.236]	0.014 [0.24]	-0.003 [0.249]	0.04 [0.25]	1.444 [1.829]
10	100	No Heterogeneity	No ecological bias	97.1 %	97.6 %	96 %	96.6 %	16 %	-0.004 [0.171]	-0.003 [0.165]	-0.004 [0.173]	-0.003 [0.169]	0.002 [0.644]
10	100	No Heterogeneity	Favouring treatment ecological bias	97.2 %	95.3 %	96.5 %	92.6 %	5.5 %	-0.001 [0.183]	0.028 [0.179]	-0.001 [0.187]	0.029 [0.181]	0.49 [0.633]
10	100	No Heterogeneity	Favouring placebo ecological bias	97.6 %	94.5 %	96.8 %	81.1 %	45.4 %	-0.005 [0.178]	0.038 [0.184]	-0.006 [0.182]	0.068 [0.179]	1.495 [0.725]
10	100	Medium Heterogeneity	No ecological bias	96.8 %	96.5 %	96 %	86.5 %	8.3 %	0.006 [0.187]	0.006 [0.184]	0.006 [0.187]	0.005 [0.191]	-0.006 [1.004]
10	100	Medium Heterogeneity	Favouring treatment ecological bias	97.7 %	97.4 %	97.2 %	82 %	5.3 %	0.007 [0.179]	0.017 [0.178]	0.005 [0.186]	0.027 [0.178]	0.544 [0.945]
10	100	Medium Heterogeneity	Favouring placebo ecological bias	96.7 %	95.2 %	96.4 %	65.2 %	23.3 %	-0.001 [0.175]	0.02 [0.174]	-0.001 [0.179]	0.053 [0.174]	1.537 [0.983]
10	100	Large Heterogeneity	No ecological bias	96.6 %	96.5 %	95.5 %	51 %	5.8 %	0.004 [0.177]	0.005 [0.177]	0.004 [0.184]	0.005 [0.186]	0.035 [1.651]
10	100	Large Heterogeneity	Favouring treatment ecological bias	96.6 %	96.1 %	96.4 %	46.7 %	5.3 %	0.004 [0.174]	0.008 [0.174]	0.006 [0.178]	0.015 [0.175]	0.483 [1.617]
10	100	Large Heterogeneity	Favouring placebo ecological bias	97.3 %	96.8 %	96.3 %	38.8 %	11.1 %	-0.005 [0.189]	0.005 [0.191]	-0.004 [0.196]	0.026 [0.198]	1.505 [1.546]
10	200	No Heterogeneity	No ecological bias	100 %	99.9 %	100 %	99.9 %	26 %	-0.001 [0.125]	-0.002 [0.123]	-0.001 [0.13]	-0.002 [0.124]	0 [0.424]
10	200	No Heterogeneity	Favouring treatment ecological bias	99.9 %	99.8 %	99.8 %	99.8 %	5 %	0.002 [0.121]	0.027 [0.123]	0.002 [0.124]	0.033 [0.119]	0.5 [0.424]
10	200	No Heterogeneity	Favouring placebo ecological bias	100 %	99.9 %	100 %	97.6 %	74.6 %	-0.002 [0.117]	0.025 [0.119]	-0.002 [0.123]	0.057 [0.126]	1.506 [0.471]
10	200	Medium Heterogeneity	No ecological bias	100 %	99.9 %	100 %	98.3 %	11.2 %	-0.005 [0.124]	-0.004 [0.125]	-0.004 [0.12]	-0.005 [0.121]	-0.016 [0.861]
10	200	Medium Heterogeneity	Favouring treatment ecological bias	99.9 %	99.9 %	99.9 %	97.3 %	6.8 %	0.001 [0.127]	0.007 [0.128]	0.001 [0.127]	0.016 [0.127]	0.474 [0.897]
10	200	Medium Heterogeneity	Favouring placebo ecological bias	99.9 %	99.9 %	99.9 %	88.4 %	25.8 %	-0.005 [0.13]	0.007 [0.13]	-0.005 [0.134]	0.031 [0.136]	1.495 [0.82]
10	200	Large Heterogeneity	No ecological bias	100 %	100 %	100 %	61.1 %	6.9 %	0.006 [0.119]	0.006 [0.119]	0.007 [0.124]	0.007 [0.122]	0.033 [1.64]
10	200	Large Heterogeneity	Favouring treatment ecological bias	99.9 %	99.9 %	99.9 %	60.4 %	5.5 %	0.001 [0.126]	0.003 [0.128]	0.001 [0.13]	0.006 [0.127]	0.415 [1.611]
10	200	Large Heterogeneity	Favouring placebo ecological bias	100 %	100 %	100 %	43.1 %	13 %	0.001 [0.122]	0.005 [0.121]	0.002 [0.128]	0.018 [0.128]	1.544 [1.641]
